# Supplementary material
Source: PubMed Central journal article supplement (PMC2234175)

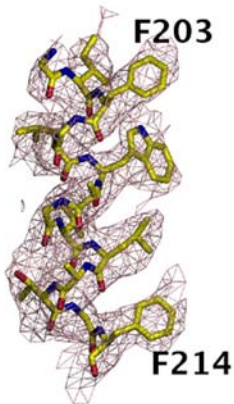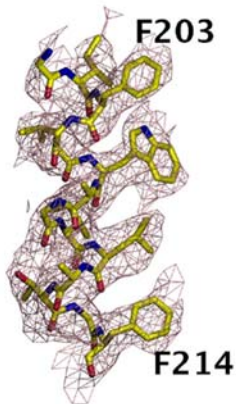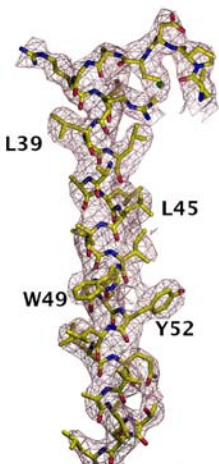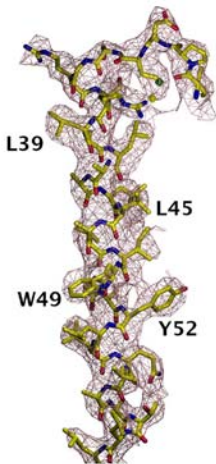

Supplement: pnas_0711533105_1.pdf [file pnas_0711533105_1.pdf]

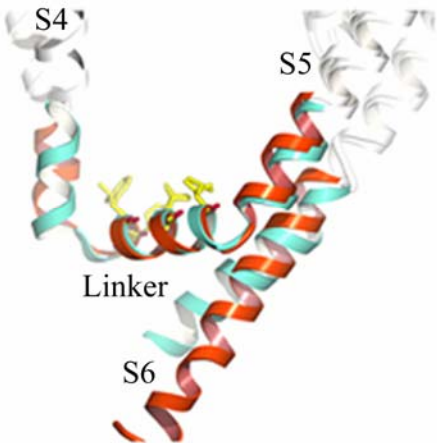

Supplement: pnas_0711533105_2.pdf [file pnas_0711533105_2.pdf]

**A)**

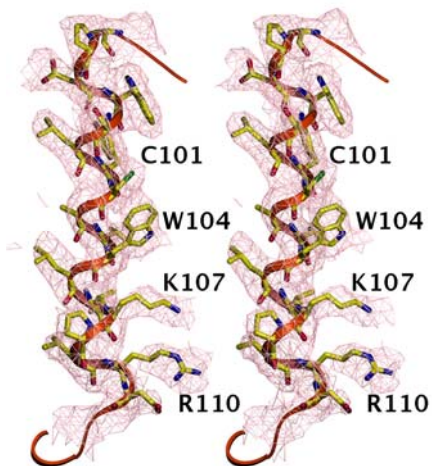

**B)**

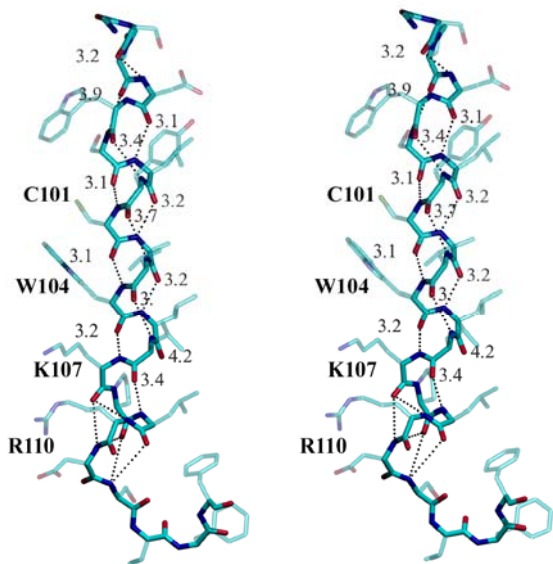

Supplement: pnas_0711533105_4.pdf [file pnas_0711533105_4.pdf]
